# Supplementary material
Source: PubMed Central journal article supplement (PMC4629846)
Supplement: NIHMS731749-supplement-SUPPLEMENTAL.pdf [file NIHMS731749-supplement-SUPPLEMENTAL.pdf]

**Supplementary data to:**

**Alcohol directly stimulates epigenetic modifications in hepatic stellate cells**

Agata Page<sup>1</sup>, Pier P. Paoli<sup>1</sup>, Stephen J. Hill<sup>1</sup>, Rachel Howarth<sup>1</sup>, Raymond Wu<sup>2</sup>, Soo-Mi Kweon<sup>2</sup>, Jeremy French<sup>1</sup>, Steve White<sup>1</sup>, Hidekazu Tsukamoto<sup>2</sup>, Derek A. Mann<sup>1</sup>,  
Jelena Mann<sup>1,\*</sup>

*<sup>1</sup>Institute of Cellular Medicine, Faculty of Medical Sciences, 4<sup>th</sup> Floor, William Leech Building, Newcastle University, Framlington Place, Newcastle upon Tyne, NE2 4HH, UK; <sup>2</sup>Southern California Research Center for ALPD and Cirrhosis and Department of Pathology, University of Southern California Keck School of Medicine; and Department of Veterans Affairs Greater Los Angeles Healthcare System, Los Angeles, California, USA*

**Table of Contents**

|                                           |    |
|-------------------------------------------|----|
| Supplementary Materials and methods ..... | 2  |
| Immunohistochemistry .....                | 2  |
| SDS-PAGE and immunoblotting .....         | 2  |
| Quantitative PCR (RT-qPCR analysis) ..... | 3  |
| Micrococcal nuclease digestion .....      | 3  |
| Supplementary Figures .....               | 4  |
| Supplementary Tables .....                | 10 |
| Supplementary References .....            | 31 |

## **Supplementary Materials and methods**

### *Immunohistochemistry*

Immunohistochemistry staining was carried out as previously described [1]. Briefly, sections of normal and diseased human liver were dewaxed in Clearene (Leica, UK) and serially dehydrated in alcohol. Endogenous peroxidase activity was blocked by hydrogen peroxide treatment for 15min. Antigen retrieval on sections was performed by microwaving in citric saline for 15min. Non-specific blocking was carried out using avidin/biotin blocking kit; slides were blocked with 20% pig serum and incubated with a 1:100 dilution of elastin (Abcam, catalogue number ab21610) or MLL1 (Bethyl, catalogue number A300-086A) antibody overnight at 4C. Slides were washed in PBS and incubated for 1h with a 1:200 dilution of swine anti-rabbit antibody (DAKO). After PBS washing, the slides were incubated with streptavidin biotin-peroxidase complex (Vector laboratories) and incubated at room temperature for 45min. Elastin or MLL1 positive cells were visualised by 3,3'-diaminobenzidine tetrahydrochloride (DAB). Slides were counterstained with Mayers Haematoxylin for 30 sec, dehydrated, cleared in Clearene (Leica) and mounted in Pertex (HistoLab).

### *SDS-PAGE and immunoblotting*

Whole-cell extracts were prepared and protein concentration of samples was determined using Bio-Rad DC Protein Assay (Bio-Rad, UK). Proteins were separated on 8% or 10% SDS polyacrylamide gel and transferred onto a nitrocellulose membrane in buffer containing 25 mM Tris, 192 mM glycine, and 20% methanol. Blots were blocked with TBS/Tween 20 (0.1% T-TBS) containing 5% milk protein before overnight incubation with primary antibodies- rabbit anti-MLL1 at 1:1000 (Bethyl, catalogue number A300-374A), rabbit anti-elastin at 1:500 (Abcam, catalogue number ab21610) or mouse anti- $\beta$  actin (Sigma, catalogue number A5316) at 1:2000 dilution, respectively. Secondary HRP conjugated antibody (raised either against rabbit or mouse antibodies) was used at 1:2000 dilution. The antibody complexes were detected by chemiluminescence using Pierce ECL Western Blotting Substrate (Thermo Scientific).

### *Quantitative PCR (RT-qPCR analysis)*

Total RNA was purified from isolated cells using the Total RNA purification kit (Qiagen, UK) following manufacturer's instructions. One microgram of total RNA was DNase treated (Promega) and used as template to generate cDNA using a random hexamer primer (p(dN)<sub>6</sub>) and MMLV reverse transcriptase (Promega). Primers for ECM components, histone lysine methyltransferases and histone lysine demethylases are included in Supplementary Table 1. SYBR Green quantitative RT-PCR reactions were performed in a total volume of 13 µl, containing 20ng of cDNA template, 6.5 µl of SYBR Green JumpStart Taq ReadyMix (Sigma), and 20pmols of forward and reverse primers (Supplementary Tables 1-3). The PCR reaction was carried out on a 7500 Fast Real-Time PCR System (Applied Biosystem, Warrington, Cheshire, UK) with the following parameters: 1 cycle at 95 °C for 10 sec followed by 40 cycles at 95 °C for 10 sec, 55 °C - 60 °C (primer pair specific annealing temperature, see Supplementary Table 1 and 2) for 30 sec, and finally 72°C for 30 sec. Melt curve analysis was employed to confirm presence of a single PCR product. All reactions were normalized to rat β-actin or human GAPDH internal control, and relative level of transcriptional difference calculated by using the following equation:  $(1/[2A]) \times 100$ .

### *Micrococcal nuclease digestion*

Native chromatin was prepared from day 2 rHSC treated with with 86 nM ethanol for 48 h, followed by nuclei isolation and suspension of nuclei to a final concentration of 0.5 mg/ml [2]. Samples were digested with 50 U of micrococcal nuclease (MNase) per one ml of 0.5 mg/ml DNA concentration within nuclei at 37°C, over a time course of 5 min. After each minute, 20-µl sample of digested DNA/nuclei was taken and the reaction stopped by adding 5mM EGTA. DNA was isolated from all samples using phenol/chloroform extraction. Chromatin fractions were analysed by electrophoresis of 10µl of each digested DNA sample loaded on a 1% agarose gel. In order to assess chromatin structure around the elastin promoter, quantitative PCRs were performed using primers: F1 (sense)- 5' GGAATCCCAGAGATCGATGA, and R1 (antisense) 5' CGATGCCTTGAATTCCTGAT.

## Supplementary Figures

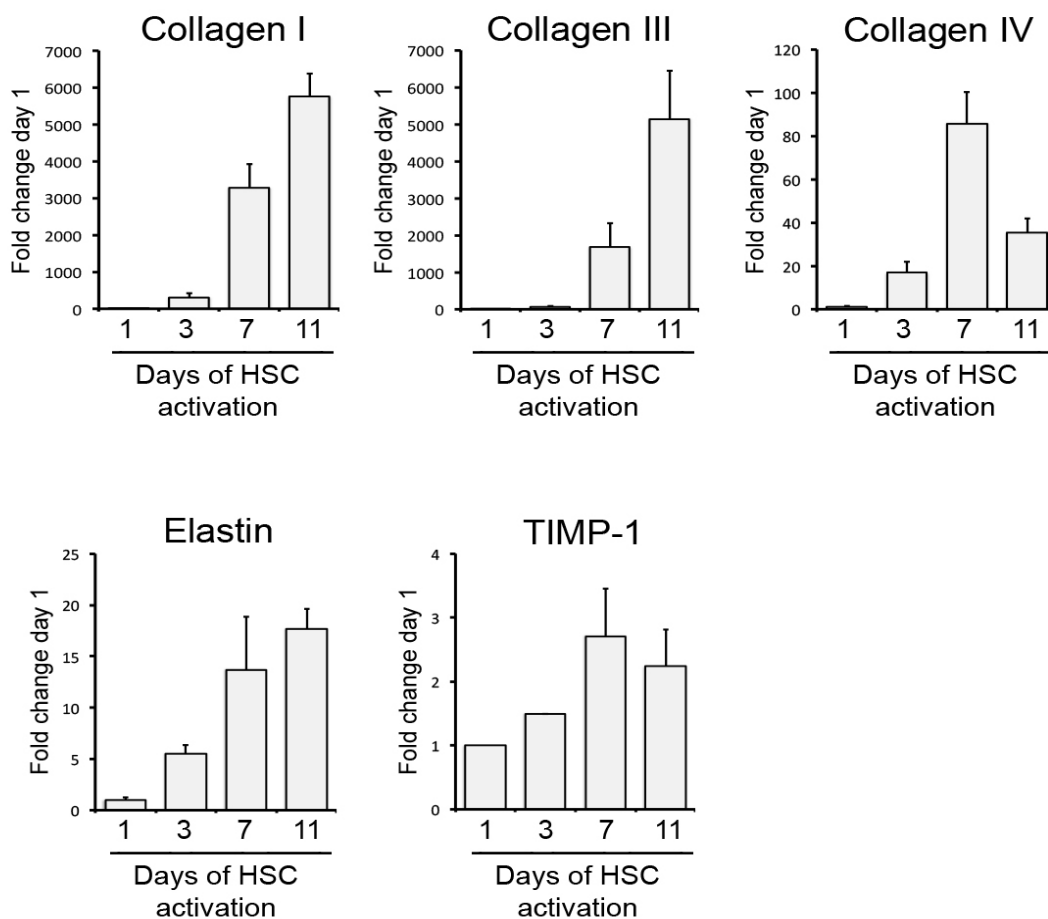

**Supplementary Fig. 1. mRNA levels of collagen I, III, IV, elastin and TIMP-1 were quantified by qPCR in four separate preparations of primary rat HSCs at day 1, 3, 7 and 11 of cell culture.**

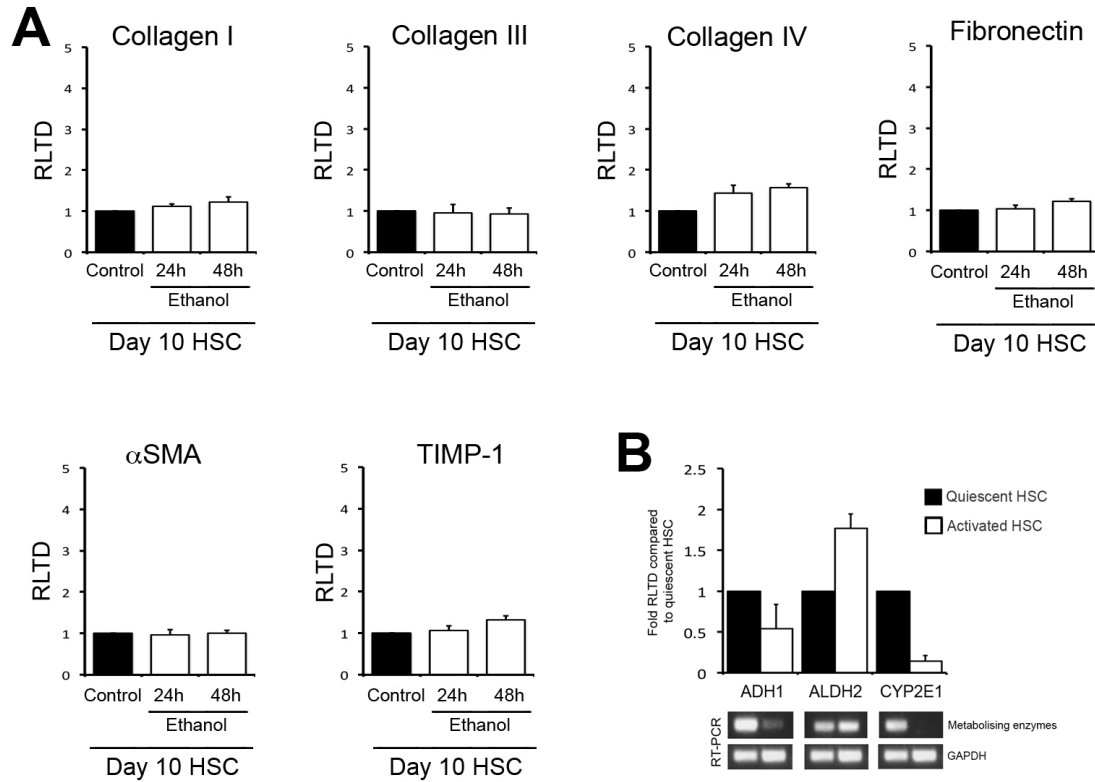

**Supplementary Fig. 2.** (A) mRNA levels of collagen I, III, IV, fibronectin,  $\alpha$ SMA and TIMP-1 were quantified by qRT-PCR in four separate preparations of rat HSCs treated at day 10 of culture for 24 h or 48 h with 86 mM ethanol. (B) mRNA levels of *ADH1*, *ALDH2* and *CYP2E1* were quantified by RT-PCR and qRT-PCR in four separate preparations of quiescent (day 1) or activated (day 10) rat HSCs.

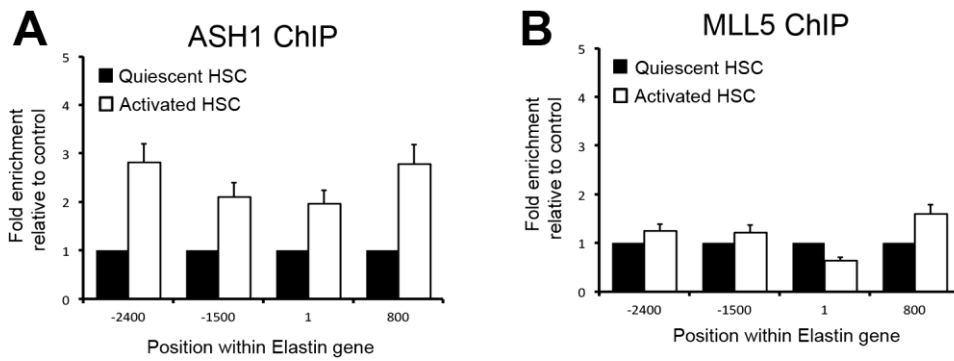

**Supplementary Fig. 3.** (A and B) 50  $\mu$ g of cross-linked chromatin from quiescent rat HSCs or fully activated myofibroblasts was incubated with 5  $\mu$ g of anti-ASH1 and MLL5 antibody and ChIP assay was carried out. Following ChIP, immunoprecipitated genomic DNA was used as template in qPCR reactions using primers specific for different regions of the elastin gene.

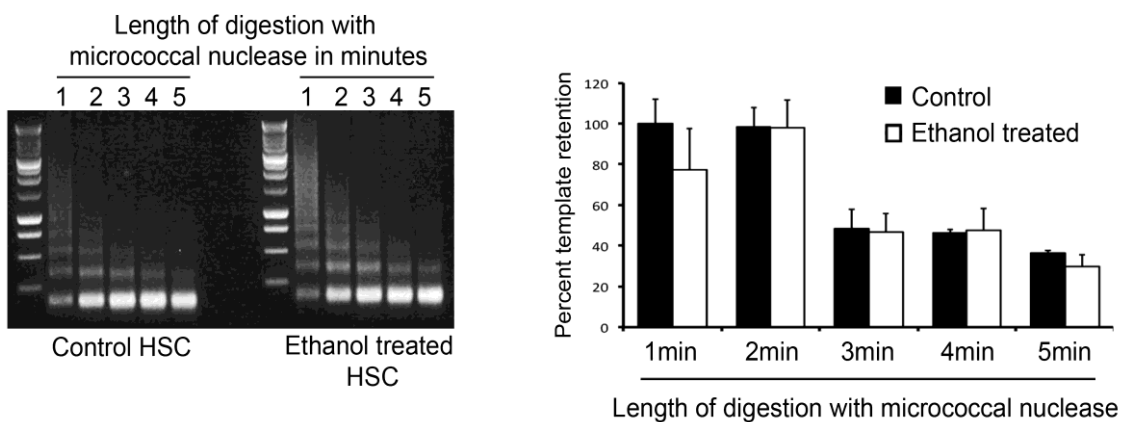

**Supplementary Fig. 4.** Native chromatin isolated from control and day 2 of rat HSCs, treated for 48 h with 86 mM ethanol was digested with micrococcal nuclease for 5 min with a sample taken every minute. Representative picture shows genomic DNA, isolated from timed digests, separated on 1% agarose gel (left panel). DNA isolated from timed digests was used as template in qPCRs, amplifying the elastin gene promoter (right panel).

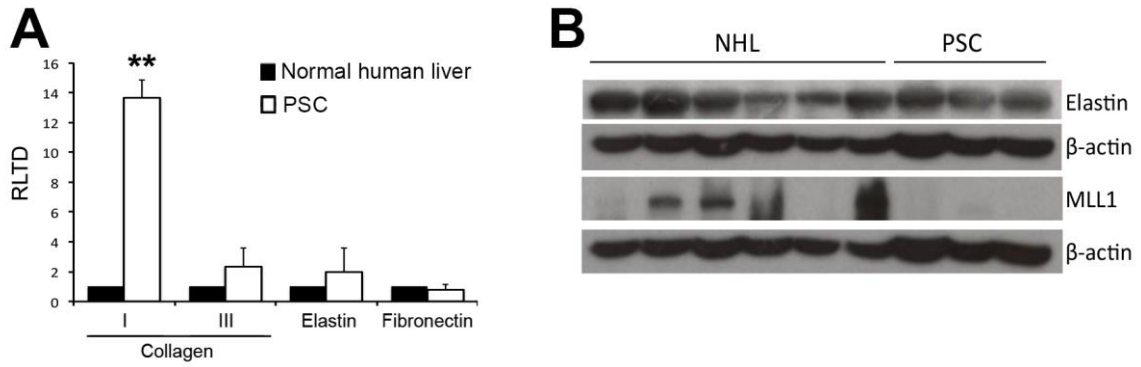

**Supplementary Fig. 5.** (A) mRNA levels of extracellular components collagen I, III, elastin and fibronectin were quantified by qPCR in six separate preparations of normal human liver or PSC liver explants. Error bars represent mean values  $\pm$  standard error of the mean (SEM).  $*p < 0.05$ . (B) 30  $\mu$ g whole cell protein from six normal human liver (NHL) or three PSC explanted liver tissue samples were immunoblotted for MLL1, elastin and  $\beta$ -actin. Error bars represent mean values  $\pm$  standard error of the mean (SEM).  $*p < 0.05$ .

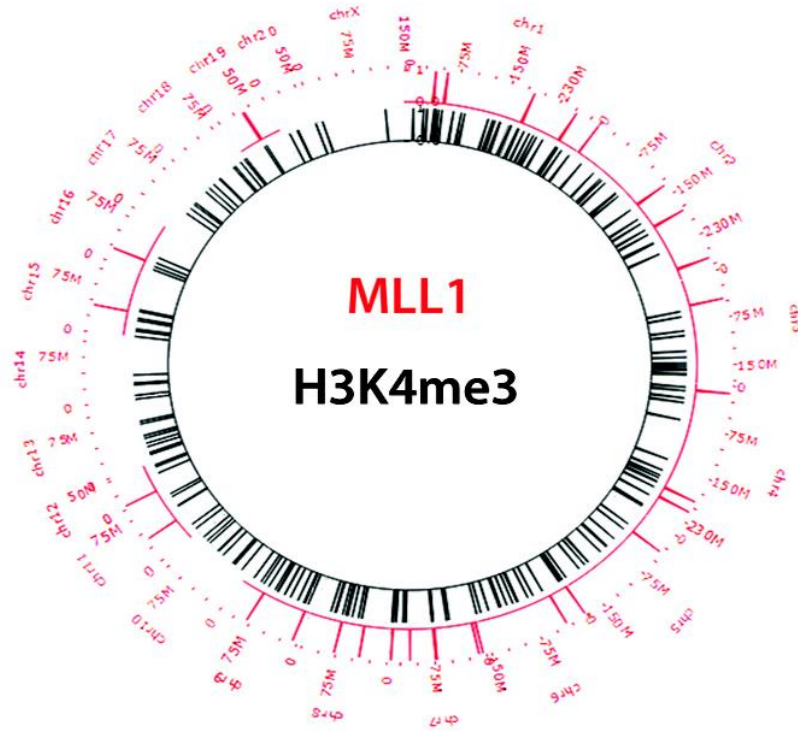

**Supplementary Fig. 6.** Aligned reads from MLL1 and H3K4me3 ChIP-Seq (as in Fig. 4A and B) were analysed using MACS software to identify significantly enriched areas compared to the control for each library. Each spike represents gene enrichment after ethanol treatment mapped to its corresponding position on the chromosome. All peaks are based on differences where  $p < 0.001$ .



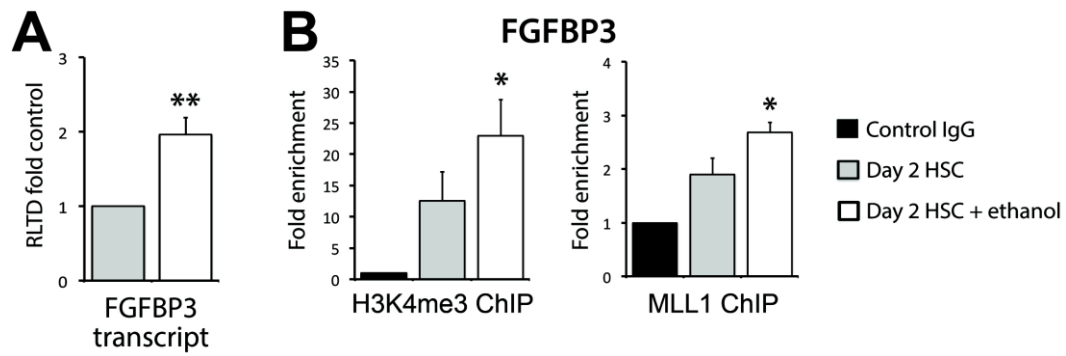

**Supplementary Fig. 7.** (A) mRNA levels of *FGFBP3* were quantified by qPCR in four separate preparations of control or rat HSCs, treated at day 2 of culture for 48 h with 86 mM ethanol. (B). ChIP assay validation for MLL1 and H3K4me3 using cross-linked chromatin from control or day 2 HSCs, treated for 48 h with 86 mM of ethanol was carried out and binding to the *FGFBP3* promoter was tested. Error bars represent mean values  $\pm$  standard error of the mean (SEM) \* $p < 0.05$ ; \*\* $p < 0.005$ .

## Supplementary Tables

**Supplementary Table 1. Quantitative PCR primers used for cDNA amplification.**

| Gene                | Forward and reverse primer pair sequences | Annealing temperature (°C) |
|---------------------|-------------------------------------------|----------------------------|
| Rat COLLAGEN I      | TTCACCTACAGCACGCTTGTG                     | 55                         |
|                     | GATGACTGTCTTGCCCCAAGTT                    |                            |
| Rat COLLAGEN III    | CTTCACCCCTCTCTTATTTT                      | 55                         |
|                     | GGCTCATCATCACACATTAT                      |                            |
| Rat COLLAGEN IV     | GCTCTGGCTGTGGAAAATGT                      | 55                         |
|                     | CTCCAGCATCACCCTTTTGT                      |                            |
| Rat FIBRONECTIN     | GAGCAAGAAGGACAACAGAG                      | 55                         |
|                     | GGTCTGGGGTTGGTAAATAG                      |                            |
| Rat ELASTIN         | CCCTGTCCCTGTTCTTCTG                       | 60                         |
|                     | CGCTCCCTATCCTCTTGTTG                      |                            |
| Human COLLAGEN I    | CAAGAGGAAGGCCAAGTCGAGG                    | 55                         |
|                     | CGTTGTTCGACAGCAGAT                        |                            |
| Human COLLAGEN III  | GCCAAATATGTGTCTGTGACTCA                   | 55                         |
|                     | GGGCGAGTAGGAGCAGTTG                       |                            |
| Human FIBRONECTIN   | ATGATGCCGACCAGAAGTTT                      | 55                         |
|                     | CACGACCATTCCCAACACAC                      |                            |
| Human ELASTIN       | GCAACCAAGGACCGTATCAT                      | 60                         |
|                     | CTGTGCTTGTCCTCTCTA                        |                            |
| Rat LSD1 (KDM1A)    | TCTCAGGAAGCAGCGTGTTT                      | 55                         |
|                     | CTATGAACTCGGTGGACAAG                      |                            |
| Rat LSD2 (KDM1B)    | CCAGCATCTTCTTCCTAAAC                      | 55                         |
|                     | TCTGGGGTCTCTTCCTACT                       |                            |
| Rat JARID1A (KDM5A) | CCTGGCAGTAGGAGCAAAG                       | 55                         |
|                     | ATCACACCCGTCACACAAAA                      |                            |
| Rat JARID1B (KDM5B) | CAAAACGGGAAAACGAGAAA                      | 55                         |
|                     | TCATTGCCGCTGCCACATAA                      |                            |
| Rat JARID1C (KDM1C) | CCTGGCAGCAGCTGTACATA                      | 55                         |
|                     | CATCTGGGCAGTCATAGCAA                      |                            |
| Rat JARID1D (KDM5D) | ACTGGTTCCATGGACAATGTG                     | 55                         |
|                     | CCTCAGGCAGCCTTACAGAC                      |                            |
| Rat JHDM1B (KDM2B)  | TATACCAGGGGGACTTCGTG                      | 55                         |
|                     | GTGTTACGTCATCACGTC                        |                            |
| Rat JHDM2A (KDM3A)  | CTCAGGTTGGAGCTGGAGAC                      | 55                         |
|                     | AGTTCAGGAGCAGTGGCATT                      |                            |
| Rat JMJD2A (KDM4A)  | TCCCAGGAAGTGCTCAAAGC                      | 55                         |
|                     | CGACGGGTAGCAAATTGGT                       |                            |
| Rat JMJD2C (KDM4C)  | ACAGAGGGAGAAGAAAATGA                      | 60                         |
|                     | CTTGCTACCTGCTGCTTTAC                      |                            |

|                                     |                         |       |
|-------------------------------------|-------------------------|-------|
| <b>Rat JMJD3<br/>(KDM6B)</b>        | AACAGCCACAGCAGTAGTCC    | 60    |
|                                     | AGGCAGGGCAAGAGTCAGTG    |       |
| <b>Human/Rat MLL1<br/>(KMT2A)</b>   | TCTGTGTTTTCCCCTCTA      | 58    |
|                                     | TTCAGGCTATCTTCTTTG      |       |
| <b>Human/Rat MLL2<br/>(KMT2D)</b>   | AGGAGGGCCCAGAACTAT      | 58    |
|                                     | GCAGTGTTTTCATGGATA      |       |
| <b>Human/Rat MLL3<br/>(KMT2C)</b>   | CAGCCGCAGACAAAAGAC      | 58    |
|                                     | ATTGTTCTTTGATTTCTG      |       |
| <b>Human/Rat MLL5<br/>(KMT2E)</b>   | CCATTGGGGGTTGATACA      | 58    |
|                                     | AGGAGGACGAGCACCATA      |       |
| <b>Human/Rat ASH1<br/>(ASH1L)</b>   | AATGATCTTTGCTGAGTGTT    | 58    |
|                                     | TCCCAACCTTTTTCCCTCAG    |       |
| <b>Human/Rat GLP<br/>(EHMT1)</b>    | ACAAACAGCGTGGTCAAG      | 58    |
|                                     | TGGAAACGGTGAGAGATG      |       |
| <b>Rat G9a<br/>(EHMT2)</b>          | GAGCCACCGAGAGAGTTC      | 58    |
|                                     | GGTGTGAGCCCCCTCATC      |       |
| <b>Human/Rat Suv39H1</b>            | GGCGCCACCTACCTCTTTGA    | 58    |
|                                     | CGTTGTACACCTGCAGGTTG    |       |
| <b>Human/Rat Suv39H2</b>            | CAAAAAGGCACACAGTATTC    | 58    |
|                                     | ACCTCTCCAACATATTCCAT    |       |
| <b>Rat EZH2</b>                     | CATTCATTTTCATACGCTCTT   | 58    |
|                                     | TTTAGGTGGTGTCTTTATCC    |       |
| <b>Rat MeCP2</b>                    | AGGCAGGGCAAAGCAGAGACATC | 55    |
|                                     | GGCAAGGTGGGGTCATCATAACA |       |
| <b>Rat TIMP-1</b>                   | ACAGCTTTCTGCAACTCGGA    | 55    |
|                                     | AGTTTGCAAGGGATGGCTGA    |       |
| <b>Rat <math>\alpha</math>-SMA</b>  | CATGTCGTCCCAGTTGGTGAT   | 55    |
|                                     | CGAAGCGCAGAGCAAGAGA     |       |
| <b>Rat ADH1</b>                     | CATCAGCACCAGCACCTTCTC   | 58    |
|                                     | CGACAGACAGACCAACACCTC   |       |
| <b>Rat ALDH2</b>                    | GCCAGGTAGCCGAAGGGAACA   | 58    |
|                                     | TTGCCGTTGTCCAGGGTCTCC   |       |
| <b>Rat CYP2E1</b>                   | ATGGAAGGATGTGCGGAGGTT   | 58    |
|                                     | AATCAGAAATGTGGGGTCAAA   |       |
| <b>Rat <math>\beta</math>-ACTIN</b> | AGCCATGTACGTAGCCATCC    | 55-60 |
|                                     | CTCTCAGCTGTGGTGGTGAA    |       |
| <b>Human GAPDH</b>                  | GAAGGTGAAGGTCGGAGTC     | 55-60 |
|                                     | GAAGATGGTGATGGGATTTC    |       |

**Supplementary Table 2. ChIP primers for the elastin gene.**

| <b>Region of elastin gene</b> | <b>Forward and reverse primer pair sequences</b> | <b>Annealing temperatures (°C)</b> |
|-------------------------------|--------------------------------------------------|------------------------------------|
| <b>Rat ELASTIN -2400</b>      | GGTGGTAGATCATGGGATGG                             | 60                                 |
|                               | GAAAGCTTGGGCACACATTT                             |                                    |
| <b>Rat ELASTIN -1500</b>      | ACGCCCTGTACTGGACAAGA                             | 55                                 |
|                               | ATGTGGGGTACTGGAGGACA                             |                                    |
| <b>Rat ELASTIN -800</b>       | ACATGGCTTTCCTCCCAAG                              | 55                                 |
|                               | GGCAAAATTGTCTGGGAGAA                             |                                    |
| <b>Rat ELASTIN +1</b>         | GCAATTACGCTTTGGGGATA                             | 60                                 |
|                               | ATCAGTCTTGCCACCTGGTC                             |                                    |
| <b>Rat ELASTIN +800</b>       | GTGAGCCCCAGCATGTAAGT                             | 60                                 |
|                               | CGATGCCTTGAATTCCTGAT                             |                                    |

**Supplementary Table 3. Quantitative PCR and ChIP primers for ChIP-Seq validation.**

**Quantitative PCR primers**

| <b>Gene</b>       | <b>Forward and reverse primer pair sequences</b> | <b>T<sub>m</sub> (°C)</b> |
|-------------------|--------------------------------------------------|---------------------------|
| <b>Rat c-JUN</b>  | ACCCACCTCCACCTTCTTGC                             | 56                        |
|                   | AGCCCTCATCCTCTTCACTG                             |                           |
| <b>Rat FGFBP3</b> | TAAATGAACTGTGCGTAAGA                             | 60                        |
|                   | AGAAGGTGTGATGCCAAGTC                             |                           |

**ChIP assay primers**

| <b>Gene</b>       | <b>Forward and reverse primer pair sequences</b> | <b>T<sub>m</sub> (°C)</b> |
|-------------------|--------------------------------------------------|---------------------------|
| <b>Rat c-JUN</b>  | CATTCCTGGGACTGCACATC                             | 60                        |
|                   | CCCCACCCTATGACATGGAA                             |                           |
| <b>Rat FGFBP3</b> | TAAATGAACTGTGCGTAAGA                             | 60                        |
|                   | AGAAGGTGTGATGCCAAGTC                             |                           |

**Supplementary Table 4. Gene list generated from top hits of combined H3K4me3 and MLL1 ChIP-Seq.**

**MLL1 and H3K4me3  
enriched genes  
following ethanol  
treatment**

| <b>Gene Symbol</b> | <b>Description</b>                                                                  | <b>Ensembl</b>     |
|--------------------|-------------------------------------------------------------------------------------|--------------------|
| JUN                | Jun proto-oncogene                                                                  | ENSRNOG00000026293 |
| ACTB               | Actin, beta                                                                         | ENSRNOG00000034254 |
| EXOC8              | Exocyst complex component 8                                                         | ENSRNOG00000019766 |
| ZFP58              | Protein Zfp580                                                                      | ENSRNOG00000016274 |
| ID3                | Inhibitor of DNA binding 3                                                          | ENSRNOG00000026124 |
| FGFBP3             | Fibroblast growth factor binding protein 3                                          | ENSRNOG00000022796 |
| MAF                | V-maf avian musculoaponeurotic fibrosarcoma oncogene homolog                        | ENSRNOG00000012428 |
| FAU                | Ubiquitin-like protein FUBI                                                         | ENSRNOG00000046393 |
| CREBZF             | CREB/ATF bZIP transcription factor                                                  | ENSRNOG00000018987 |
| SF3B5              | Splicing factor 3b, subunit 5                                                       | ENSRNOG00000014908 |
| COX7C              | Cytochrome c oxidase, subunit VIIc                                                  | ENSRNOG00000030237 |
| SMIM4              | Small Integral Membrane Protein 4                                                   | ENSRNOG00000028178 |
| IMP3               | U3 small nucleolar ribonucleoprotein, homolog (yeast)                               | ENSRNOG00000017460 |
| MSX3               | Msh homeobox 3                                                                      | ENSRNOG00000046776 |
| MGAT2              | Mannosyl (alpha-1,6-)-glycoprotein beta-1,2-N-acetylglucosaminyltransferase (Mgat2) | ENSRNOG00000004234 |
| DEXI               | Dexamethasone-induced transcript                                                    | ENSRNOG00000002635 |

|                    |                                                                |                    |
|--------------------|----------------------------------------------------------------|--------------------|
| HIST2H3C2          | Histone H3                                                     | ENSRNOG00000045644 |
| ZFYVE9             | Zinc finger, FYVE domain containing 9                          | ENSRNOG00000027183 |
| CD28               | Cd28 molecule                                                  | ENSRNOG00000010283 |
| SRSF2              | Serine/arginine-rich splicing factor 2                         | ENSRNOG00000000248 |
| VOM2R37            | Vomer nasal 2 receptor, 37                                     | ENSRNOG00000043280 |
| PIGP               | Phosphatidylinositol N-acetylglucosaminyltransferase subunit P | ENSRNOG00000039850 |
| TOR1AIP2           | Torsin A interacting protein 2                                 | ENSRNOG00000024849 |
| IER3               | Immediate early response 3                                     | ENSRNOG00000000827 |
| RUNDC1             | Protein Rundc1                                                 | ENSRNOG00000023768 |
| MUCF1              | Microtubule-actin crosslinking factor 1                        | ENSRNOG00000016047 |
| DST                | Protein Dst                                                    | ENSRNOP00000017235 |
| HERC2              | HECT and RLD domain containing E3 ubiquitin protein ligase 2   | ENSRNOG00000013718 |
| RYR1               | Ryanodine receptor 1, skeletal muscle                          | ENSRNOG00000020557 |
| DNAH8              | Dynein, axonemal, heavy chain 8                                | ENSRNOG00000000542 |
| LRP1               | Low density lipoprotein receptor-related protein 1             | ENSRNOG00000025053 |
| VPS13C             | Vacuolar protein sorting 13C (yeast)                           | ENSRNOG00000030213 |
| DNAH2              | Protein Dnah2                                                  | ENSRNOG00000021356 |
| DYNC1H1            | Dynein, Cytoplasmic 1, Heavy Chain 1                           | ENSRNOG00000006178 |
| DNAH1              | Dynein, Axonemal, Heavy Chain 1                                | ENSRNOG00000026914 |
| LAMA5              | Laminin, Alpha 5                                               | ENSRNOG00000006479 |
| LYST               | Lysosomal Trafficking Regulator                                | ENSRNOG00000012662 |
| STAB2              | Stabilin 2                                                     | ENSRNOG00000038948 |
| USP34              | Ubiquitin Specific Peptidase 34                                | ENSRNOG00000026034 |
| ENSRNOP00000056216 | Protein Neb                                                    | ENSRNOG00000006783 |
| OBSCN              | Obscurin, cytoskeletal calmodulin and titin-interacting RhoGEF | ENSRNOG00000022790 |

**MLL1 enriched genes  
following ethanol  
treatment**

| <b>Gene Symbol</b> | <b>Description</b>                                                                     | <b>Ensembl</b>     |
|--------------------|----------------------------------------------------------------------------------------|--------------------|
| COL26A1            | Collagen, Type XXVI, Alpha 1                                                           | ENSRNOG00000001422 |
| INSR               | Insulin receptor                                                                       | ENSRNOG00000029986 |
| PLOD3              | Procollagen-Lysine, 2-Oxoglutarate 5-Dioxygenase 3                                     | ENSRNOG00000001417 |
| RCL1               | RNA Terminal Phosphate Cyclase-Like 1                                                  | ENSRNOG00000015491 |
| PLD                | Phospholipase D1, Phosphatidylcholine-Specific                                         | ENSRNOG00000028566 |
| UNC5C              | Unc-5 Homolog C (C. Elegans)                                                           | ENSRNOG00000029071 |
| ATG7               | Autophagy Related 7                                                                    | ENSRNOG00000007486 |
| MMP16              | Matrix Metalloproteinase 16 (Membrane-Inserted)                                        | ENSRNOG00000005708 |
| CLIP4              | CAP-GLY Domain Containing Linker Protein Family, Member 4                              | ENSRNOG00000008806 |
| SDC2               | Syndecan 2                                                                             | ENSRNOG00000004936 |
| OLR1               | Oxidized Low Density Lipoprotein (Lectin-Like) Receptor 1                              | ENSRNOG00000008375 |
| ARPC2              | Actin Related Protein 2/3 Complex, Subunit 2                                           | ENSRNOG00000014289 |
| CTDSP1             | CTD (Carboxy-Terminal Domain, RNA Polymerase II, Polypeptide A)<br>Small Phosphatase 1 | ENSRNOG00000015295 |
| GRM                | Glutamate Receptor, Metabotropic 1                                                     | ENSRNOG00000014290 |
| UTRN               | Utrophin                                                                               | ENSRNOG00000011058 |
| NELL1              | NEL-like 1                                                                             | ENSRNOG00000015675 |
| PTGFRN             | Prostaglandin F2 Receptor Inhibitor                                                    | ENSRNOG00000015655 |
| CASC1              | Cancer Susceptibility Candidate 1                                                      | ENSRNOG00000027630 |



|         |                                                                                        |                    |
|---------|----------------------------------------------------------------------------------------|--------------------|
| LTBP1   | Latent Transforming Growth Factor Beta Binding Protein 1                               | ENSRNOG00000033090 |
| GALNTL6 | UDP-N-Acetyl-Apha-D-Galactosamine:polypeptide N-Acetylgalactosaminyltransferase-Like 6 | ENSRNOG00000047809 |
| PHACTR1 | Phosphatase And Actin Regulator 1                                                      | ENSRNOG00000014264 |
| SSLP1   | Spleen Protein 1 Precursor                                                             | ENSRNOG00000008563 |

**H3K4me3 enriched  
genes following ethanol  
treatment**

| <b>Gene Symbol</b> | <b>Description</b>                                                | <b>Ensembl</b>     |
|--------------------|-------------------------------------------------------------------|--------------------|
| STX7               | Syntaxin 7                                                        | ENSRNOG00000015670 |
| RGS17              | Regulator Of G-Protein Signaling 17                               | ENSRNOG00000018690 |
| IPCEF1             | Interaction Protein For Cytohesin Exchange Factors 1              | ENSRNOG00000018163 |
| RSPH3              | Radial Spoke 3 Homolog (Chlamydomonas)                            | ENSRNOG00000018762 |
| LENG9              | Leukocyte Receptor Cluster (LRC) Member 9                         | ENSRNOG00000018621 |
| DNAJB13            | DnaJ (Hsp40) Homolog, Subfamily B, Member 13                      | ENSRNOG00000017975 |
| SPON1              | Spondin 1, Extracellular Matrix Protein                           | ENSRNOG00000034303 |
| EEF2K              | Eukaryotic Elongation Factor-2 Kinase                             | ENSRNOG00000016448 |
| RIC8A              | RIC8 Guanine Nucleotide Exchange Factor A                         | ENSRNOG00000013256 |
| PAPSS2             | 3'-Phosphoadenosine 5'-Phosphosulfate Synthase 2                  | ENSRNOG00000011068 |
| ZFYVE27            | Zinc Finger, FYVE Domain Containing 27                            | ENSRNOG00000014903 |
| FAM160B1           | Family With Sequence Similarity 160, Member B1                    | ENSRNOG00000017225 |
| POLK               | Polymerase (DNA Directed) Kappa                                   | ENSRNOG00000025373 |
| PTGER4             | Prostaglandin E Receptor 4 (Subtype EP4)                          | ENSRNOG00000013240 |
| FLAD1              | Flavin Adenine Dinucleotide Synthetase 1                          | ENSRNOG00000020642 |
| GSTM2              | Glutathione S-Transferase Mu 2 (Muscle)                           | ENSRNOG00000019094 |
| ATXN7L2            | Ataxin 7-Like 2                                                   | ENSRNOG00000028749 |
| SLC25A12           | Solute Carrier Family 25 (Aspartate/Glutamate Carrier), Member 12 | ENSRNOG00000022922 |
| TTC7               | Tetratricopeptide Repeat Domain 7A                                | ENSRNOG00000014879 |
| API5               | Apoptosis Inhibitor 5                                             | ENSRNOG00000009689 |
| TRIM44             | Tripartite Motif Containing 44                                    | ENSRNOG00000005191 |

|          |                                                                            |                    |
|----------|----------------------------------------------------------------------------|--------------------|
| TRIB3    | Tribbles Pseudokinase 3                                                    | ENSRNOG00000007319 |
| RBL1     | Retinoblastoma-Like 1 (P107)                                               | ENSRNOG00000006921 |
| CTNBL1   | Catenin, Beta Like 1                                                       | ENSRNOG00000012021 |
| NCOA5    | Nuclear Receptor Coactivator 5                                             | ENSRNOG00000017824 |
| KCNB1    | Potassium Voltage-Gated Channel, Shab-Related Subfamily, Member 1          | ENSRNOG00000046949 |
| MAD2L1   | MAD2 Mitotic Arrest Deficient-Like 1 (Yeast)                               | ENSRNOG00000005376 |
| HK2      | Hexokinase 2                                                               | ENSRNOG00000006116 |
| GATA2    | GATA Binding Protein 2                                                     | ENSRNOG00000012347 |
| UBE2R2   | Ubiquitin-Conjugating Enzyme E2R 2                                         | ENSRNOG00000010727 |
| SVEP1    | Sushi, Von Willebrand Factor Type A, EGF And Pentraxin Domain Containing 1 | ENSRNOG00000033110 |
| ALAD     | Aminolevulinate Dehydratase                                                | ENSRNOG00000015206 |
| JAK1     | Janus Kinase 1                                                             | ENSRNOG00000011157 |
| YIPF1    | Yip1 Domain Family, Member 1                                               | ENSRNOG00000010512 |
| ERMAP    | Erythroblast Membrane-Associated Protein (Scianna Blood Group)             | ENSRNOG00000000335 |
| SRM      | Spermidine Synthase                                                        | ENSRNOG00000011078 |
| GNB1     | Guanine Nucleotide Binding Protein (G Protein), Beta Polypeptide 1         | ENSRNOG00000016638 |
| CDC42EP3 | CDC42 Effector Protein (Rho GTPase Binding) 3                              | ENSRNOG00000032136 |
| AKAP6    | A Kinase (PRKA) Anchor Protein 6                                           | ENSRNOG00000004841 |
| LRFN5    | Leucine Rich Repeat And Fibronectin Type III Domain Containing 5           | ENSRNOG00000005550 |
| TIMM9    | Translocase Of Inner Mitochondrial Membrane 9 Homolog (Yeast)              | ENSRNOG00000008222 |
| FCF1     | FCF1 RRNA-Processing Protein                                               | ENSRNOG00000004723 |
| BTBD7    | BTB (POZ) Domain Containing 7                                              | ENSRNOG00000008598 |
| SYT1     | Synaptotagmin I                                                            | ENSRNOG00000006426 |
| PAWR     | PRKC, Apoptosis, WT1, Regulator                                            | ENSRNOG00000005917 |
| HRSP12   | Heat-Responsive Protein 12                                                 | ENSRNOG00000005437 |

|         |                                                                                |                     |
|---------|--------------------------------------------------------------------------------|---------------------|
| POP1    | Processing Of Precursor 1, Ribonuclease P/MRP Subunit ( <i>S. Cerevisiae</i> ) | ENSRNOG00000005243  |
| TXN2    | Thioredoxin 2                                                                  | ENSRNOG00000005614  |
| ADSL    | Adenylosuccinate Lyase                                                         | ENSRNOG00000018655  |
| CYB5R3  | Cytochrome B5 Reductase 3                                                      | ENSRNOG00000009592  |
| IRAK4   | Interleukin-1 Receptor-Associated Kinase 4                                     | ENSRNOG00000005965  |
| SLC48A1 | Solute Carrier Family 48 (Heme Transporter), Member 1                          | ENSRNOG00000008192  |
| SIK3    | SIK Family Kinase 3                                                            | ENSRNOG00000045931  |
| ZC3H12C | Zinc Finger CCCH-Type Containing 12C                                           | ENSRNOG00000012470  |
| TPM1    | Tropomyosin 1 (Alpha)                                                          | ENSRNOG00000018184  |
| BMP5    | Bone Morphogenetic Protein 5                                                   | ENSRNOG00000010917  |
| SNAP91  | Synaptosomal-Associated Protein                                                | ENSRNOG00000023861  |
| SNX14   | Sorting Nexin 14                                                               | ENSRNOG00000011348  |
| ATR     | Ataxia Telangiectasia And Rad3 Related                                         | ENSRNOG00000010027  |
| TJAP1   | Tight Junction Associated Protein 1                                            | ENSRNOG00000018980  |
| PMS1    | Postmeiotic Segregation Increased 1                                            | ENSRNOG00000004076  |
| STAT1   | Signal Transducer And Activator Of Transcription 1                             | ENSRNOG00000014079  |
| WDR12   | WD Repeat Domain 12                                                            | ENSRNOG00000017340  |
| NDUFV2  | NADH Dehydrogenase (Ubiquinone) Flavoprotein 2                                 | ENSRNOG00000042503  |
| CLINT1  | Clathrin Interactor 1                                                          | ENSRNOG00000005406  |
| MGAT1   | Mannosyl (Alpha-1,3-)-Glycoprotein Beta-1,2-N-Acetylglucosaminyltransferase    | ENSRNOG000000031208 |
| MYO1D   | Myosin ID                                                                      | ENSRNOG00000003276  |
| VPS25   | Vacuolar Protein Sorting 25 Homolog                                            | ENSRNOG00000020441  |
| COA3    | Cytochrome C Oxidase Assembly Factor 3                                         | ENSRNOG00000020487  |
| ACOX1   | Acyl-CoA Oxidase 1, Palmitoyl                                                  | ENSRNOG00000008755  |
| LPP     | LIM Domain Containing Preferred Translocation Partner In Lipoma                | ENSRNOG000000031669 |

|          |                                                                     |                    |
|----------|---------------------------------------------------------------------|--------------------|
| ALG3     | Alpha-1,3- Mannosyltransferase                                      | ENSRNOG00000001712 |
| CCDC60   | Coiled-Coil Domain Containing 60                                    | ENSRNOG00000032684 |
| NCKAP5   | NCK-Associated Protein 5                                            | ENSRNOG00000021553 |
| FAIM3    | Fas Apoptotic Inhibitory Molecule 3                                 | ENSRNOG00000004441 |
| RASSF5   | Ras Association (RalGDS/AF-6) Domain Family Member 5                | ENSRNOG00000005342 |
| RGL1     | Ral Guanine Nucleotide Dissociation Stimulator-Like 1               | ENSRNOG00000002347 |
| SLC10A6  | Solute Carrier Family 10 (Sodium/Bile Acid Cotransporter), Member 6 | ENSRNOG00000002057 |
| TMEM156  | Transmembrane Protein 156                                           | ENSRNOG00000026518 |
| PSME4    | Proteasome (Prosome, Macropain) Activator Subunit 4                 | ENSRNOG00000006609 |
| FAM149B1 | Family With Sequence Similarity 149, Member B1                      | ENSRNOG00000006554 |
| LGALS3   | Lectin, Galactoside-Binding, Soluble, 3                             | ENSRNOG00000010645 |
| SPATA13  | Spermatogenesis Associated 13                                       | ENSRNOG00000013707 |
| HIST1H2A | Histone Cluster 1, H2a                                              | ENSRNOG00000017175 |
| PLXDC2   | Plexin Domain Containing 2                                          | ENSRNOG00000000142 |
| USP14    | Ubiquitin Specific Peptidase 14 (TRNA-Guanine Transglycosylase)     | ENSRNOG00000014981 |
| CDC25C   | Cell Division Cycle 25C                                             | ENSRNOG00000024008 |
| HTR4     | 5-Hydroxytryptamine (Serotonin) Receptor 4, G Protein-Coupled       | ENSRNOG00000019134 |
| MALT1    | Mucosa Associated Lymphoid Tissue Lymphoma Translocation Gene 1     | ENSRNOG00000017181 |
| SMAD2    | SMAD Family Member 21                                               | ENSRNOG00000018140 |
| PHKB     | Phosphorylase Kinase, Beta                                          | ENSRNOG00000024101 |
| RNASEH2A | Ribonuclease H2, Subunit A                                          | ENSRNOG00000003504 |
| HERC4    | HECT And RLD Domain Containing E3 Ubiquitin Protein Ligase 4        | ENSRNOG00000000381 |
| RHOBTB1  | Rho-Related BTB Domain Containing 1                                 | ENSRNOG00000000633 |
| GRIK2    | Glutamate Receptor, Ionotropic, Kainate 2                           | ENSRNOG00000000368 |
| FUNDC1   | FUN14 Domain Containing 1                                           | ENSRNOG00000003470 |
| DDN      | Dendrin                                                             | ENSRNOG00000014789 |

**Supplementary Table 5. Gene list generated from top hits of combined H3K4me3 and MLL1 ChIP-Seq.**

**MLL1 and H3K4me3  
enriched genes in  
alcohol fed mice**

| <b>Gene Symbol</b> | <b>Description</b>                                             | <b>Ensembl</b>     |
|--------------------|----------------------------------------------------------------|--------------------|
| ADAM19             | <b>ADAM</b> Metallopeptidase Domain 19                         | ENSMUST00000011400 |
| DOCK4              | Dedicator of Cytokinesis 4                                     | ENSMUST00000037488 |
| MAST4              | Microtubule Associated Serine/Threonine Kinase Family Member 4 | ENSMUST00000164111 |
| MAML3              | Mastermind-Like 3                                              | ENSMUST00000121440 |
| ASTN2              | Astrotactin 2                                                  | ENSMUST00000084496 |
| FGGY               | <b>FGGY</b> Carbohydrate Kinase Domain Containing              | ENSMUST00000130541 |
| KAZN               | Kazrin, Periplakin Interacting Protein                         | ENSMUST00000036476 |
| PLXNA4             | Plexin A4                                                      | ENSMUST00000115096 |
| EXOC4              | Exocyst Complex Component 4                                    | ENSMUST00000052266 |
| GRM7               | Glutamate Receptor, Metabotropic 7                             | ENSMUST00000172951 |
| FGFR2              | Fibroblast Growth Factor Receptor 2                            | ENSMUST00000124096 |
| ARHGAP44           | Rho GTPase Activating Protein 44                               | ENSMUST00000093001 |
| RBFOX3             | RNA Binding Protein, Fox-1 Homolog                             | ENSMUST00000120061 |
| STXBP6             | Syntaxin Binding Protein                                       | ENSMUST00000143376 |
| GPHN               | Gephyrin                                                       | ENSMUST00000052472 |
| PTPRN2             | Protein Tyrosine Phosphatase, Receptor Type, N Polypeptide 2   | ENSMUST00000070733 |
| CLDN10             | Claudin 10                                                     | ENSMUST00000071546 |
| CDH18              | Cadherin 18, Type 2                                            | ENSMUST00000167623 |
| CSMD3              | CUB And Sushi Multiple Domains 3                               | ENSMUST00000162830 |

|                |                                                                                                |                           |
|----------------|------------------------------------------------------------------------------------------------|---------------------------|
| SAMD12         | Sterile Alpha Motif Domain Containing 12                                                       | ENSMUST00000078673        |
| GNB1L          | Guanine Nucleotide Binding Protein (G Protein), Beta Polypeptide 1-Like                        | ENSMUST00000147739        |
| ERG            | V-Ets Avian Erythroblastosis Virus E26 Oncogene Homolog                                        | ENSMUST00000171646        |
| PTPRM          | Protein Tyrosine Phosphatase, Receptor Type, M                                                 | ENSMUST00000037974        |
| TRPM3          | Transient Receptor Potential Cation Channel, Subfamily M, Member 3                             | ENSMUST00000087576        |
| BTRC           | Beta-Transducin Repeat Containing E3 Ubiquitin Protein Ligase                                  | ENSMUST00000111936        |
| PRPF18         | Pre-mRNA Processing Factor 18                                                                  | ENSMUST00000035721        |
| LYPD6B         | LY6/PLAUR Domain Containing 6B                                                                 | ENSMUST00000028103        |
| LRRC4C         | Leucin Rich Repeat Containing 4C                                                               | ENSMUST00000162807        |
| RBBP9          | Retinoblastoma Binding Protein 9                                                               | ENSMUST00000028915        |
| ZFP831         | Zinc Finger Protein 831                                                                        | ENSMUST00000059452        |
| CDH4           | Cadherin 4                                                                                     | ENSMUST00000108911        |
| NFIA           | Nuclear Factor I/A                                                                             | ENSMUST00000107057        |
| MAGI2          | Membrane Associated Guanylate Kinase, WW And PDZ Domain Containing 2                           | ENSMUST00000115267        |
| SDK1           | Sidekick Cell Adhesion Molecule 1                                                              | ENSMUST00000074546        |
| DENND2A        | DENN/MADD Domain Containing 2A                                                                 | ENSMUST00000036877        |
| GRIN2B         | Glutamate Receptor, Ionotropic, N-Methyl D-Aspartate 2B                                        | ENSMUST00000053880        |
| RASA3          | RAS P21 Protein Activator 3                                                                    | ENSMUST00000117551        |
| <b>GALNTL6</b> | <b>UDP-N-Acetyl-Alpha-D-Galactosamine:Polypeptide N-Acetylgalactosaminyltransferase-Like 6</b> | <b>ENSMUST00000077447</b> |
| RNF50          | Ring Finger protein 50                                                                         | ENSMUST00000078525        |

**MLL1 enriched genes in  
alcohol fed mice**

| <b>Gene Symbol</b> | <b>Description</b>                                     | <b>Ensembl</b>            |
|--------------------|--------------------------------------------------------|---------------------------|
| ITGB6              | Integrin Beta 6                                        | ENSMUST00000154764        |
| FRAS1              | Fraser Syndrome 1; Extracellular Matrix Protein        | ENSMUST00000036019        |
| ITGA9              | Integrin Alpha 9                                       | ENSMUST00000124360        |
| ALDH8A1            | Aldehyde Dehydrogenase 8 Family, Member A1             | ENSMUST00000042699        |
| LAMA2              | Laminin                                                | ENSMUST00000092639        |
| JARID2             | Jumonji, AT Rich Interactive Domain 2                  | ENSMUST00000174086        |
| CYP2D34            | Cytochrome P450, Family 2, Subfamily d, Polypeptide 34 | ENSMUST00000109515        |
| COL8A1             | Collagen, Type VIII, Alpha 1                           | ENSMUST00000089332        |
| PKHD1              | Polycystic Kidney And Hepatic Disease 1                | ENSMUST00000088448        |
| JAK2               | Janus Kinase 2                                         | ENSMUST00000025705        |
| FGF2               | Fibroblast Growth Factor 2                             | ENSMUST00000091203        |
| COL11A1            | Collagen, Type XI, Alpha 1                             | ENSMUST00000123619        |
| COL24A1            | Collagen, Type XXIV, Alpha 1                           | ENSMUST00000029848        |
| <b>SPON1</b>       | <b>Spondin 1; Extracellular Matrix Protein</b>         | <b>ENSMUST00000084696</b> |
| CREBBP             | CREB Binding Protein                                   | ENSMUST00000023165        |
| MYO5B              | Myosin                                                 | ENSMUST00000121875        |
| CDC123             | Cell Division Cycle 123                                | ENSMUST00000043864        |
| IL18RAP            | Interleukin 18 Receptor Accessory Protein              | ENSMUST00000027237        |
| FMN1               | Formin 1                                               | ENSMUST00000161731        |
| IL7                | Interleukin 7                                          | ENSMUST00000168269        |
| TNIK               | TRAF2 And NCK Interacting Kinase                       | ENSMUST00000162777        |



|          |                                                                            |                    |
|----------|----------------------------------------------------------------------------|--------------------|
| CAMK2D   | Calcium/Calmodulin-Dependent Protein Kinase II Delta                       | ENSMUST00000170149 |
| NGR1     | Neuronal Growth Regulator 1                                                | ENSMUST00000106065 |
| COL27A1  | Collagen, Type XXVII, Alpha 1                                              | ENSMUST00000036300 |
| DMP1     | Dentin Matrix Acidic Phosphoprotein 1 <sup>4</sup>                         | ENSMUST00000066708 |
| SPOCK3   | Sparc/Osteonectin, Cwcv And Kazal-Like Domains Proteoglycan                | ENSMUST00000093480 |
| TGFBP2   | Transforming Growth Factor, Beta Receptor II                               | ENSMUST00000035014 |
| IL1RAPL1 | Interleukin 1 Receptor Accessory Protein-Like 1                            | ENSMUST00000113964 |
| TERF2    | Telomeric Repeat Binding Factor 2                                          | ENSMUST00000068421 |
| CCDC79   | Coiled-Coil Domain Containing 79                                           | ENSMUST00000162014 |
| LTBP1    | Latent Transforming Growth Factor Beta Binding Protein 1                   | ENSMUST00000001927 |
| GRIK2    | Glutamate Receptor, Ionotropic, Kainate 2 (Beta 2)                         | ENSMUST00000105483 |
| YIPF2    | Yip1 Domain Family, Member 1                                               | ENSMUST00000128284 |
| BMP5     | Bone Morphogenetic Protein 5                                               | ENSMUST00000012281 |
| SDR16C5  | Short Chain Dehydrogenase/Reductase Family 16C, Member 5                   | ENSMUST00000040925 |
| DPT      | Dermatopontin                                                              | ENSMUST00000027861 |
| GREM2    | Gremlin 2 Homolog                                                          | ENSMUST00000055294 |
| LIMS1    | LIM And Senescent Cell Antigen-Like Domains 1                              | ENSMUST00000020078 |
| CAR10    | Carbonic Anhydrase 10                                                      | ENSMUST00000107863 |
| FHIT     | Fragile Histidine Triad Gene                                               | ENSMUST00000160956 |
| FERMT2   | Fermitin Family Homolog 2                                                  | ENSMUST00000045905 |
| PTK2B    | PTK2 Protein Tyrosine Kinase 2 Beta                                        | ENSMUST00000111121 |
| PRKAA1   | Protein Kinase, AMP-Activated, Alpha 1 Catalytic Subunit                   | ENSMUST00000051186 |
| ADAMTS20 | Disintegrin-Like And Metallopeptidase With Thrombospondin Type 1 Motif, 20 | ENSMUST00000035342 |
| ADAM33   | Disintegrin And Metallopeptidase Domain 33                                 | ENSMUST00000147333 |
| ADAM12   | Disintegrin And Metallopeptidase Domain 12                                 | ENSMUST00000067680 |
| ADAMTS17 | Disintegrin-Like And Metallopeptidase With Thrombospondin Type 1 Motif, 20 | ENSMUST00000107478 |

|          |                                                        |                    |
|----------|--------------------------------------------------------|--------------------|
| ADAMTSL3 | Adamts Like 3                                          | ENSMUST00000173828 |
| FIBP     | Fibroblast Growth Factor Intracellular Binding Protein | ENSMUST00000025847 |
| LAMC3    | Laminin Gamma 3                                        | ENSMUST00000028187 |
| KIF16B   | Kinesin Family Member 16B                              | ENSMUST00000043589 |
| FLT1     | FMS Like Tyrosine Kinase 1                             | ENSMUST00000031653 |
| CTSC     | Cathepsin C                                            | ENSMUST00000128791 |
| SPOCK3   | Sparc/ Osteonectin                                     | ENSMUST00000093480 |
| NKD1     | Naked Cuticle 1 Homolog                                | ENSMUST00000169179 |
| ST14     | Supression of tumorigenicity 14                        | ENSMUST00000034478 |
| NRG4     | Neuregulin 4                                           | ENSMUST00000164721 |
| MAP2K1   | Mitogen-Activated Protein Kinase 1                     | ENSMUST00000005066 |

**H3K4me3 enriched  
genes in alcohol fed  
mice**

| <b>Gene Symbol</b> | <b>Description</b>                                            | <b>Ensembl</b>            |
|--------------------|---------------------------------------------------------------|---------------------------|
| Col4A3             | Collagen, Type IV, Alpha 3                                    | ENSMUST00000113457        |
| CASC3              | Cancer Susceptibility Candidate 3                             | ENSMUST00000169695        |
| MYL4               | Myosin, Light Polypeptide 4                                   | ENSMUST00000106956        |
| RACGAP1            | Rac GTPase-Activating Protein 1                               | ENSMUST00000023756        |
| PEBP4              | Phosphatidylethanolamine-Binding Protein 4                    | ENSMUST00000022678        |
| <b>DEXI</b>        | <b>Dexamethasone-Induced Transcript</b>                       | <b>ENSMUST00000038281</b> |
| IL1RAP             | Interleukin 1 Receptor Accessory Protein                      | ENSMUST00000023156        |
| CCDC80             | Coiled-Coil Domain Containing 80                              | ENSMUST00000061050        |
| ASH1I              | Absent, Small, or Homeotic-Like                               | ENSMUST00000090933        |
| FGF13              | Fibroblast Growth Factor 13                                   | ENSMUST00000124402        |
| FLNA               | Filamin A, Alpha                                              | ENSMUST00000114299        |
| RIPK1              | Receptor (TNFRSF)-Interacting Serine-Threonine Kinase 1       | ENSMUST00000171137        |
| SPOCK1             | Sparc/Osteonectin, Cwcv And Kazal-Like Domains Proteoglycan 1 | ENSMUST00000172326        |
| USP54              | Ubiquitin Specific Peptidase 54                               | ENSMUST00000035340        |
| CCDC50             | Coiled-Coil Domain Containing 50                              | ENSMUST00000039443        |
| <b>EMILIN2</b>     | <b>Elastin Microfibril Interfacer 2</b>                       | <b>ENSMUST00000024849</b> |
| NRG2               | Neuregulin 2                                                  | ENSMUST00000115705        |
| IL33               | Interleukin 33                                                | ENSMUST00000144528        |
| SETDB1             | SET Domain, Bifurcated 1                                      | ENSMUST00000107170        |
| USP33              | Ubiquitin Specific Peptidase 33                               | ENSMUST00000117492        |

|          |                                                                                |                    |
|----------|--------------------------------------------------------------------------------|--------------------|
| RBBP4    | Retinoblastoma Binding Protein 4                                               | ENSMUST00000135585 |
| MLL3     | Lysine (K)-Specific Methyltransferase 2C                                       | ENSMUST00000045291 |
| ELFN1    | Extracellular Leucine-Rich Repeat And Fibronectin Type III Domain Containing 1 | ENSMUST00000050519 |
| CFTR     | Cystic Fibrosis Transmembrane Conductance Regulator                            | ENSMUST00000115406 |
| WNT5B    | Wingless-Related MMTV Integration Site 5B                                      | ENSMUST00000119369 |
| IL4I1    | Interleukin 4 Induced 1                                                        | ENSMUST00000033015 |
| NELL1    | NELL-Like1                                                                     | ENSMUST00000151721 |
| VPS13C   | Vacuolar Protein Sorting 13 Homolog C                                          | ENSMUST00000077879 |
| ADHFE1   | Alcohol Dehydrogenase, Iron Containing, 1                                      | ENSMUST00000144177 |
| TERF1    | Telomeric Repeat Binding Factor 1                                              | ENSMUST00000027057 |
| DST      | Dystonin                                                                       | ENSMUST00000115104 |
| STAT4    | Signal Transducer And Activator Of Transcription 4                             | ENSMUST00000027277 |
| HTR2B    | 5-Hydroxytryptamine (Serotonin) Receptor 2B, G Protein-Coupled                 | ENSMUST00000027431 |
| TRAF3IP1 | TNF Receptor-Associated Factor 3 Interacting Protein 1                         | ENSMUST00000047242 |
| TNFSF4   | Tumor Necrosis Factor (Ligand) Superfamily, Member 4                           | ENSMUST00000028024 |
| SMYD3    | SET And MYND Domain Containing 3                                               | ENSMUST00000128302 |
| HHAT     | Hedgehog Acyltransferase                                                       | ENSMUST00000154755 |
| EGR2     | Early Growth Response                                                          | ENSMUST00000127820 |
| EFEMP1   | EGF Containing Fibulin-Like Extracellular Matrix Protein 1                     | ENSMUST00000139713 |
| MGAT1    | Mannoside Acetylglucosaminyltransferase 1                                      | ENSMUST00000109194 |
| COL23A1  | Collagen, Type XXIII, Alpha 1                                                  | ENSMUST00000102765 |
| FRK      | Fyn-Related Kinase                                                             | ENSMUST00000019913 |
| EZH1     | Enhancer of Zeste Homolog 1                                                    | ENSMUST00000100417 |
| ITGB1BP1 | Integrin Beta 1 Binding Protein 1                                              | ENSMUST00000172834 |
| HDAC9    | Histone Deacetylase                                                            | ENSMUST00000085463 |
| PTPRN2   | Protein Tyrosine Phosphatase, Receptor Type, N Polypeptide 2                   | ENSMUST00000070733 |

|          |                                                                                       |                    |
|----------|---------------------------------------------------------------------------------------|--------------------|
| DNAHC1   | Dynein, Axonemal, Heavy Polypeptide 1                                                 | ENSMUST00000048603 |
| TNFRSF19 | Tumor Necrosis Factor Receptor Superfamily, Member 19                                 | ENSMUST00000111236 |
| SQSTM1   | Sequestosome 1                                                                        | ENSMUST00000143379 |
| RCBTB2   | Regulator Of Chromosome Condensation (RCC1) And BTB (POZ) Domain Containing Protein 2 | ENSMUST00000110952 |
| GPC6     | Glypican 6                                                                            | ENSMUST00000125435 |
| SAMD12   | Sterile Alpha Motif Domain Containing 12                                              | ENSMUST00000078673 |
| ITFG3    | Integrin Alpha FG-GAP Repeat Containing 3                                             | ENSMUST00000118487 |
| MAPK4    | Mitogen-Activated Protein Kinase 4                                                    | ENSMUST00000159162 |
| JHDM1A   | Lysine (K)-Specific Demethylase 2A                                                    | ENSMUST00000116571 |
| RASGRP1  | RAS Guanyl Releasing Protein 1                                                        | ENSMUST00000173252 |
| CTDSPL2  | CTD (Carboxy-Terminal Domain, RNA Polymerase II, Polypeptide A) Small                 | ENSMUST00000110574 |
| RTEL1    | Regulator Of Telomere Elongation Helicase 1                                           | ENSMUST00000153112 |
| TLR4     | Toll-Like receptor 4                                                                  | ENSMUST00000107365 |
| USP24    | Ubiquitin Specific Peptidase 24                                                       | ENSMUST00000094933 |
| MAPK10   | Mitogen-Activated Protein Kinase 10                                                   | ENSMUST00000112846 |
| RTKN     | Rhotekin                                                                              | ENSMUST00000087938 |
| USP5     | Ubiquitin Specific Peptidase 5                                                        | ENSMUST00000122110 |
| ITFG2    | Integrin Alpha FG-GAP Repeat Containing 2                                             | ENSMUST00000001559 |
| FBL      | Fibrillarin                                                                           | ENSMUST00000042405 |
| MYO9A    | Myosin IXA                                                                            | ENSMUST00000128341 |
| USP3     | Ubiquitin Specific Peptidase 3                                                        | ENSMUST00000174387 |
| ALDH1A3  | Aldehyde Dehydrogenase 1 Family, Member A3                                            | ENSMUST00000015278 |
| DST      | Dystonin                                                                              | ENSMUST00000115104 |
| RGS17    | Regulator of G-protein signaling 17                                                   | ENSMUST00000019909 |
| API5     | Apoptosis Inhibitor 5                                                                 | ENSMUST00000028617 |

|         |                                                                            |                    |
|---------|----------------------------------------------------------------------------|--------------------|
| SYT1    | Synaptotagmin I                                                            | ENSMUST00000156979 |
| CXXC5   | CXXC Finger 5                                                              | ENSMUST00000060722 |
| ADHFE1  | Alcohol Dehydrogenase, Iron Containing, 1                                  | ENSMUST00000144177 |
| INPP5D  | Inositol Polyphosphate-5-Phosphatase D                                     | ENSMUST00000167032 |
| TNS3    | Tensin3                                                                    | ENSMUST00000020695 |
| RPS6KA5 | Ribosomal Protein S6 Kinase, Polypeptide 5                                 | ENSMUST00000043599 |
| HRH2    | Histamine Receptor H2                                                      | ENSMUST00000038101 |
| GPC6    | Glypican 6                                                                 | ENSMUST00000125435 |
| GHR     | Growth Hormone Receptor                                                    | ENSMUST00000110697 |
| ADAMTS1 | Disintegrin-Like And Metalloproteinase With Thrombospondin Type 1 Motif, 1 | ENSMUST00000023610 |
| FER     | Fer Protein Kinase                                                         | ENSMUST00000038080 |
| RPS6KA4 | Ribosomal Protein S6 Kinase, Polypeptide 4                                 | ENSMUST00000025903 |
| ADAMTS3 | Disintegrin-Like And Metalloproteinase With Thrombospondin Type 1 Motif, 3 | ENSMUST00000061427 |
| CDH11   | Cadherin 11                                                                | ENSMUST00000075190 |
| CXCR5   | Chemokine Receptor 5                                                       | ENSMUST00000062215 |

Genes highlighted in red overlap with *in vitro* results

## Supplementary References

1. Oakley, F., et al., *Nuclear factor-kappaB1 (p50) limits the inflammatory and fibrogenic responses to chronic injury*. *Am J Pathol*, 2005. **166**(3): p. 695-708.
2. O'Neill, L.P. and B.M. Turner, *Immunoprecipitation of native chromatin: NChIP*. *Methods*, 2003. **31**(1): p. 76-82.
